# Supplementary material
Source: publisher site journal article supplement (https://www.dovepress.com/get_supplementary_file.php?f=282989.docx)
Supplement: Supplementary file 1 [file get_supplementary_file.php]

Table 1. List of up-regulated and down-regulated DEGs

| Common up-regulated DEGs | Common down-regulated DEGs |
| --- | --- |
| *CENPF* | FAM3D |
| *FANCA* | ESR1 |
| *NEK2* | IGFBP5 |
| *DTL* | AR |
| *RAD54L* | SPON1 |
| *CDCA5* | THSD4 |
| *INHBA* | MPPED2 |
| *CHTF18* | SH3BGRL2 |
| *UHRF1* | FAM189A2 |
| *CDKN2A* | SFTA2 |
| *CHAF1B* | GCNT3 |
| *KIF2C* | EDN3 |
| *TIMELESS* | SORBS1 |
| *WDHD1* | CRISP2 |
| *WDR90* | CRYM |
| *CDT1* | SH3BP5 |
| *MDK* | SLC27A6 |
| *NUSAP1* | SLC5A1 |
| *MCM2* | CXCL14 |
| *ANLN* | ID4 |
| *MCM5* | GREB1 |
| *CDC45* | ZG16B |
| *SPAG5* | NUCB2 |
| *KBTBD12* | GULP1 |
| *E2F7* | MAOB |
| *CENPN* | SLPI |
| *TK1* |  |
| *CCNB2* |  |
| *GINS2* |  |
| *KIF23* |  |
| *MCM4* |  |
| *TCAM1P* |  |
| *APOC1* |  |
| *DONSON* |  |
| *DEPDC1* |  |
| *MMP1* |  |
| *GMNN* |  |
| *RPL39L* |  |
| *MCM7* |  |
| *ADAM8* |  |
| *CLDN1* |  |
| *PCNA* |  |
| *KLHDC7B* |  |
| *ETS2* |  |
| *PRC1* |  |
| *TPX2* |  |
| *ZWINT* |  |
| *BCL2L12* |  |
| *RECQL4* |  |
| *HS6ST2* |  |
| *FEN1* |  |
| *GRB10* |  |
| *SIK1* |  |
| *ARHGAP4* |  |
| *SYCP2* |  |
| *FST* |  |
| *SOX4* |  |
| *LINC01116* |  |
| *ASB2* |  |
| *UCHL1* |  |
| *MMP9* |  |
| *SLC2A1* |  |
| *HSPA6* |  |
